# Supplementary material for: Understanding Female Employment and Wages in Indonesia: The Importance of Accounting for Non-cognitive Skills
Source: Research Square preprint supplement (doi:10.21203/rs.3.rs-7748385/v1), 2025-11-19
Supplement: Supplementary file 1 [file 6d5b5480f3088efac018d0d2.docx]

**Appendix**

**Table 6.** Probit estimation for labor market participation

| VARIABLES | Married Women | |  | Unmarried Women | |
| --- | --- | --- | --- | --- | --- |
|  | (1) | (2) |  | (3) | (4) |
| Extraversion |  | 0.087*** |  |  | 0.012 |
|  |  | [0.031] |  |  | [0.169] |
| Conscientiousness |  | 0.058 |  |  | 0.394** |
|  |  | [0.037] |  |  | [0.190] |
| Openness to experience |  | 0.007 |  |  | -0.191 |
|  |  | [0.027] |  |  | [0.184] |
| Agreeableness |  | 0.014 |  |  | -0.071 |
|  |  | [0.042] |  |  | [0.199] |
| Neuroticism |  | -0.051** |  |  | -0.055 |
|  |  | [0.022] |  |  | [0.113] |
| *Educational level (reference group: below lower secondary high school* | | | | | |
| High school at upper secondary (general) | -0.072 | -0.084 |  | -0.978** | -1.013** |
| [0.056] | [0.056] |  | [0.416] | [0.432] |
| High school at upper secondary (vocational) | -0.044 | -0.057 |  | -0.683 | -0.737 |
| [0.063] | [0.063] |  | [0.432] | [0.451] |
| Post-secondary diploma | 0.589*** | 0.568*** |  | -2.273*** | -2.371*** |
| [0.094] | [0.095] |  | [0.637] | [0.643] |
| Bachelor’s or above | 1.158*** | 1.124*** |  | -2.665*** | -2.703*** |
| [0.069] | [0.070] |  | [0.521] | [0.540] |
| Age | 0.087*** | 0.083*** |  | 0.785* | 0.739 |
|  | [0.018] | [0.018] |  | [0.476] | [0.509] |
| Age2 | -0.001*** | -0.001*** |  | -0.007 | -0.005 |
|  | [0.000] | [0.000] |  | [0.011] | [0.012] |
| Urban | 0.086** | 0.085** |  | 0.075 | 0.013 |
|  | [0.043] | [0.043] |  | [0.263] | [0.259] |
| No. of siblings | -0.003 | -0.004 |  | 0.033 | 0.038 |
|  | [0.009] | [0.009] |  | [0.065] | [0.067] |
| No. of Children | 0.015 | 0.016 |  |  |  |
|  | [0.020] | [0.020] |  |  |  |
| Husband’s Hourly wage (log) | 0.009* | 0.008* |  |  |  |
|  | [0.004] | [0.004] |  |  |  |
| Parent financial support |  |  |  | -0.643 | -0.620 |
|  |  |  |  | [0.398] | [0.381] |
| *Ethnicity (reference group: Javanese)* | | | | | |
| Sundanese | -0.207*** | -0.197*** |  | -0.860* | -0.865 |
|  | [0.062] | [0.062] |  | [0.492] | [0.538] |
| Other ethnicity | -0.193*** | -0.185*** |  | -0.291 | -0.356 |
|  | [0.043] | [0.044] |  | [0.217] | [0.219] |
| *Husband’s Highest education level completed for Married women; Mothers Highest education level completed for Unmarried women* | | | | | |
| High school at upper secondary (general) |  |  |  | -0.359 | -0.307 |
|  |  |  | [0.262] | [0.266] |
| High school at upper secondary (vocational) |  |  |  | -0.785** | -0.803** |
|  |  |  | [0.383] | [0.376] |
| Post-secondary diploma |  |  |  | 1.002 | 1.151* |
|  |  |  | [0.611] | [0.661] |
| Bachelor’s or above |  |  |  | -0.313 | -0.201 |
|  |  |  | [0.316] | [0.325] |
| Constant | -2.064*** | -2.453*** |  | -10.847** | -10.872** |
|  | [0.325] | [0.373] |  | [4.757] | [5.221] |
|  |  |  |  |  |  |
| Observations | 4,399 | 4,399 |  | 288 | 288 |
| Pseudo R-squared | 0.0884 | 0.0917 |  | 0.517 | 0.528 |
| Chi-square | 466.6 | 484.2 |  | 105.6 | 110.2 |
| Log Likelihood | -2750 | -2740 |  | -92.70 | -90.60 |
| Robust standard errors in brackets. *** p<0.01, ** p<0.05, * p<0.1 | | | | | |

**Table 7.** Descriptive statistics by matital status (Mean and Standard deviation), Wage earners

| Variable | Married women | | | Unmarried women | | |
| --- | --- | --- | --- | --- | --- | --- |
| Obs | Mean | SD | Obs | Mean | SD |
| Hourly wage (IDR) | 1202 | 13508 | 16273.4 | 69 | 14067 | 9982.1 |
| Hourly wage (log) | 1202 | 8.947 | 1.171 | 69 | 9.182 | 1.085 |
| Openness to experience | 1202 | 3.615 | 0.751 | 69 | 3.536 | 0.724 |
| Conscientiousness | 1202 | 4.039 | 0.552 | 69 | 3.935 | 0.575 |
| Extraversion | 1202 | 3.752 | 0.671 | 69 | 3.841 | 0.615 |
| Agreeableness | 1202 | 4.143 | 0.494 | 69 | 4.051 | 0.486 |
| Neuroticism | 1202 | 2.995 | 0.886 | 69 | 3.275 | 0.910 |
| *Educational attainments:* | | | | | | |
| Lower Secondary | 1202 | 0.370 | 0.483 | 69 | 0.116 | 0.323 |
| Upper Secondary (general) | 1202 | 0.148 | 0.355 | 69 | 0.130 | 0.339 |
| Upper Secondary (vocational) | 1202 | 0.127 | 0.333 | 69 | 0.246 | 0.434 |
| Post-secondary diploma | 1202 | 0.087 | 0.282 | 69 | 0.174 | 0.382 |
| Bachelor’s or above | 1202 | 0.267 | 0.443 | 69 | 0.333 | 0.475 |
| Age | 1202 | 36.5 | 8.162 | 69 | 22.9 | 3.541 |
| Age2 | 1202 | 1400.2 | 616.5 | 69 | 539.36 | 184.06 |
| Number of Siblings | 1202 | 3.863 | 2.313 | 69 | 3.232 | 2.030 |
| Urban | 1202 | 0.753 | 0.431 | 69 | 0.855 | 0.355 |
| Support from parents |  |  |  | 69 | 0.638 | 0.484 |
| *Ethnicity* |  |  |  |  |  |  |
| Javanese | 1202 | 0.498 | 0.500 | 69 | 0.478 | 0.503 |
| Sundanese | 1202 | 0.132 | 0.339 | 69 | 0.116 | 0.323 |
| Other ethnicity | 1202 | 0.369 | 0.483 | 69 | 0.406 | 0.495 |
| Number of Children | 1202 | 1.238 | 1.206 |  |  |  |
| Husband’s Hourly wage (log) | 1202 | 4.465 | 4.771 |  |  |  |
| *Father’s educational attainments:* | | | | | | |
| Lower Secondary |  |  |  | 69 | 0.667 | 0.475 |
| Upper Secondary (general) |  |  |  | 69 | 0.159 | 0.369 |
| Upper Secondary (vocational) |  |  |  | 69 | 0.043 | 0.205 |
| Post-secondary diploma |  |  |  | 69 | 0.043 | 0.205 |
| Bachelor’s or above |  |  |  | 69 | 0.087 | 0.284 |
| *Job Sectors:* |  |  |  |  |  |  |
| Government worker | 1202 | 0.209 | 0.407 | 69 | 0.087 | 0.284 |
| Private worker agriculture | 1202 | 0.710 | 0.454 | 69 | 0.841 | 0.369 |
| Casual worker not in agridulture | 1202 | 0.082 | 0.274 | 69 | 0.072 | 0.261 |
